# Supplementary material
Source: Springer Nature journal article supplement (https://www.springermedizin.de/resource/supplementary/13075_2011_3467_MOESM3_ESM.pdf/9694566)

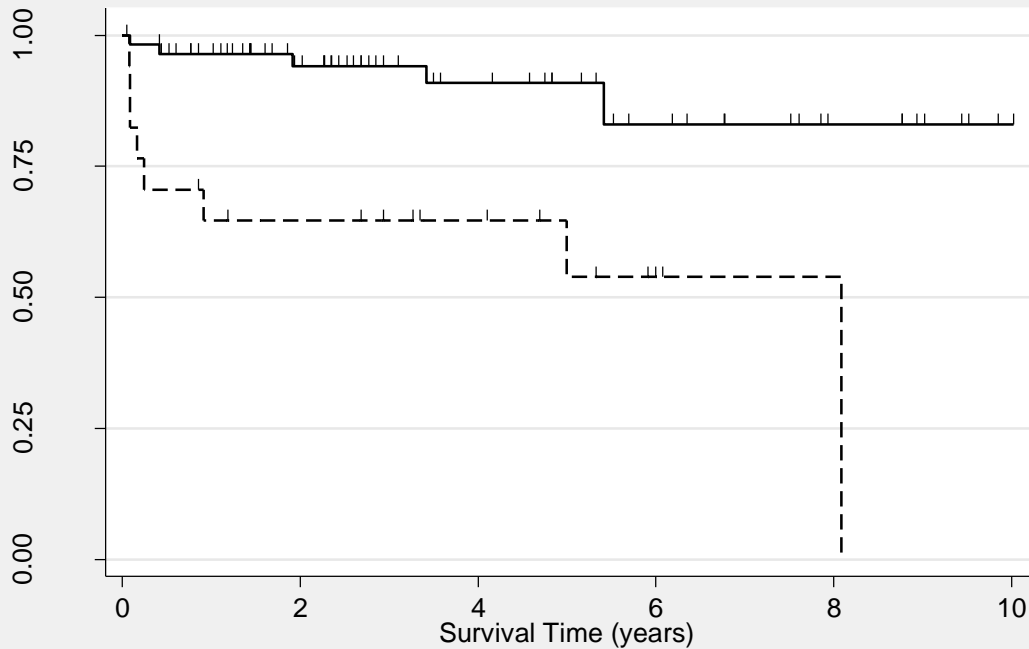

— oral steroid    - - - - IV steroid

Supplement: MOESM3 [file 9694566]
